# Supplementary material for: Ultra-high piezo-photocatalytic performance of (Na, Sm) co-doped CaBi2Nb2O9 nanoplates by the surface effect
Source: Royal Society of Chemistry journal article supplement (doi:10.1039/d4ta04350b), 2024-01-01
Supplement: d4ta04350b1.pdf [file d4ta04350b1.pdf]

## Supplementary Information

### Ultra-high piezo-photocatalytic performance of (Na, Sm) co-doped $\text{CaBi}_2\text{Nb}_2\text{O}_9$ nanoplates by surface effect

*Qiuyan Yi, Xiaogang Luo, Xuefan Zhou, Yan Zhao, Qiong Liu, Qiwei Sun, Hang Luo\**,

*Dou Zhang\**

State Key Laboratory of Powder Metallurgy, Central South University, Changsha,  
Hunan 410083, China

**\*Corresponding author**

E-mail address:

hangluo@csu.edu.cn (Hang Luo)

dzhang@csu.edu.cn (Dou Zhang)

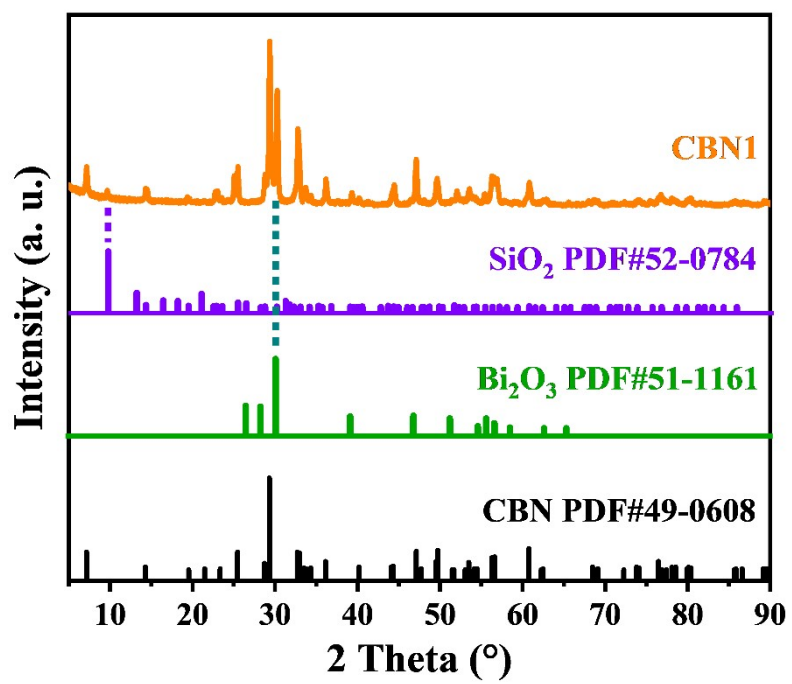

Figure S1 XRD pattern of CBN1.

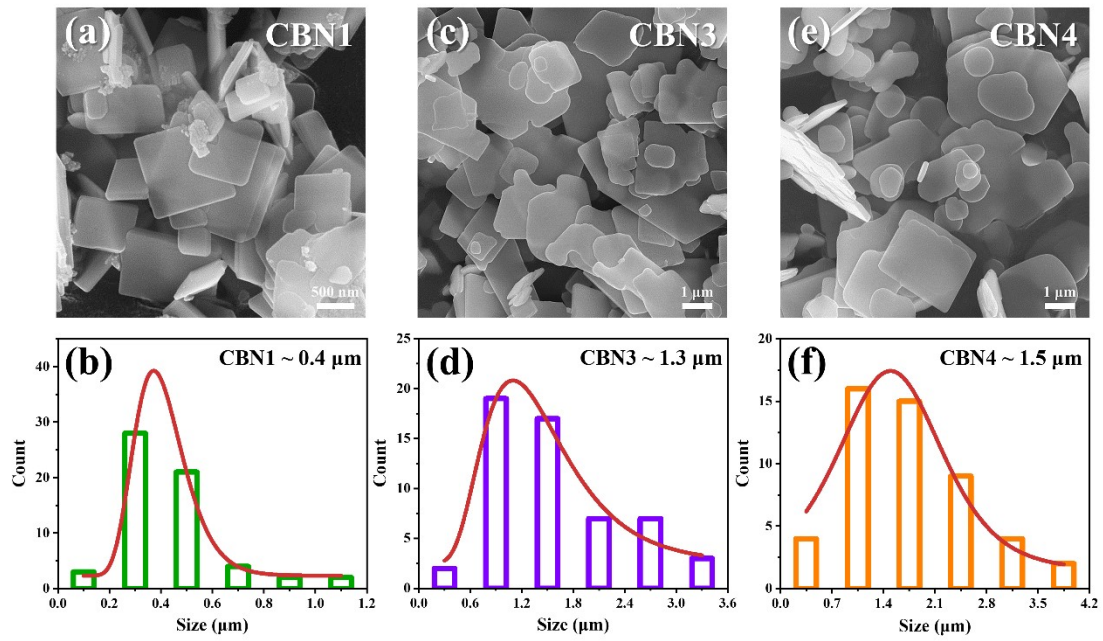

**Figure S2** SEM images of a) CBN1, c) CBN3, and e) CBN4. Distribution maps of grain sizes of b) CBN1, d) CBN3, and f) CBN4.

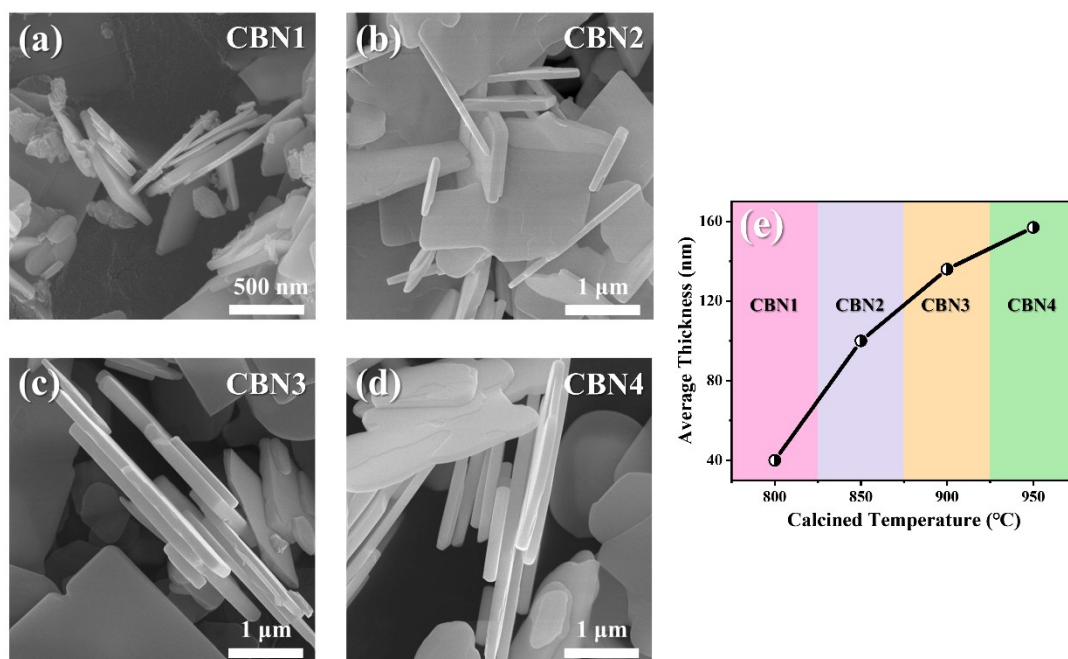

**Figure S3** SEM images focusing on the thickness of a) CBN1, b) CBN2, c) CBN3, and d) CBN4. e) The increasing average thickness with the calcined temperature.

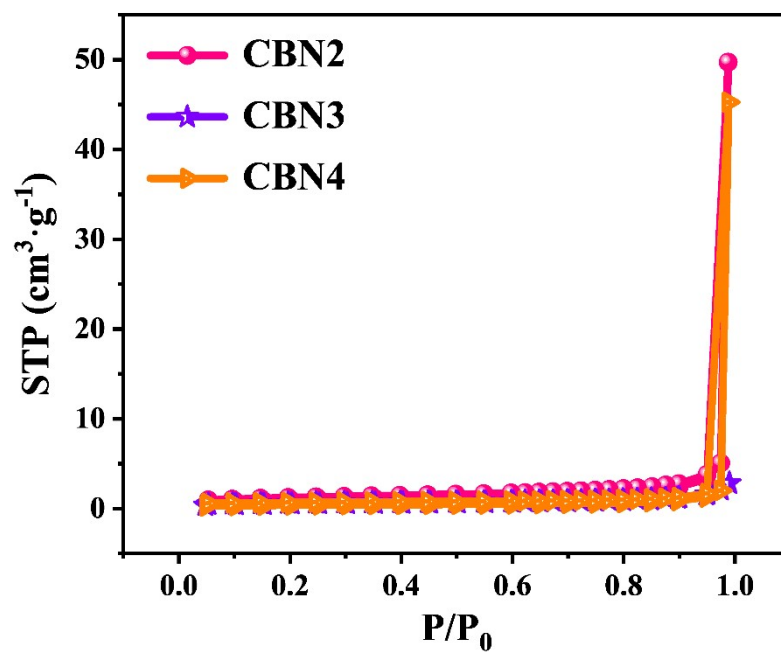

**Figure S4**  $N_2$  isothermal adsorption curves of CBN2, CBN3, and CBN4.

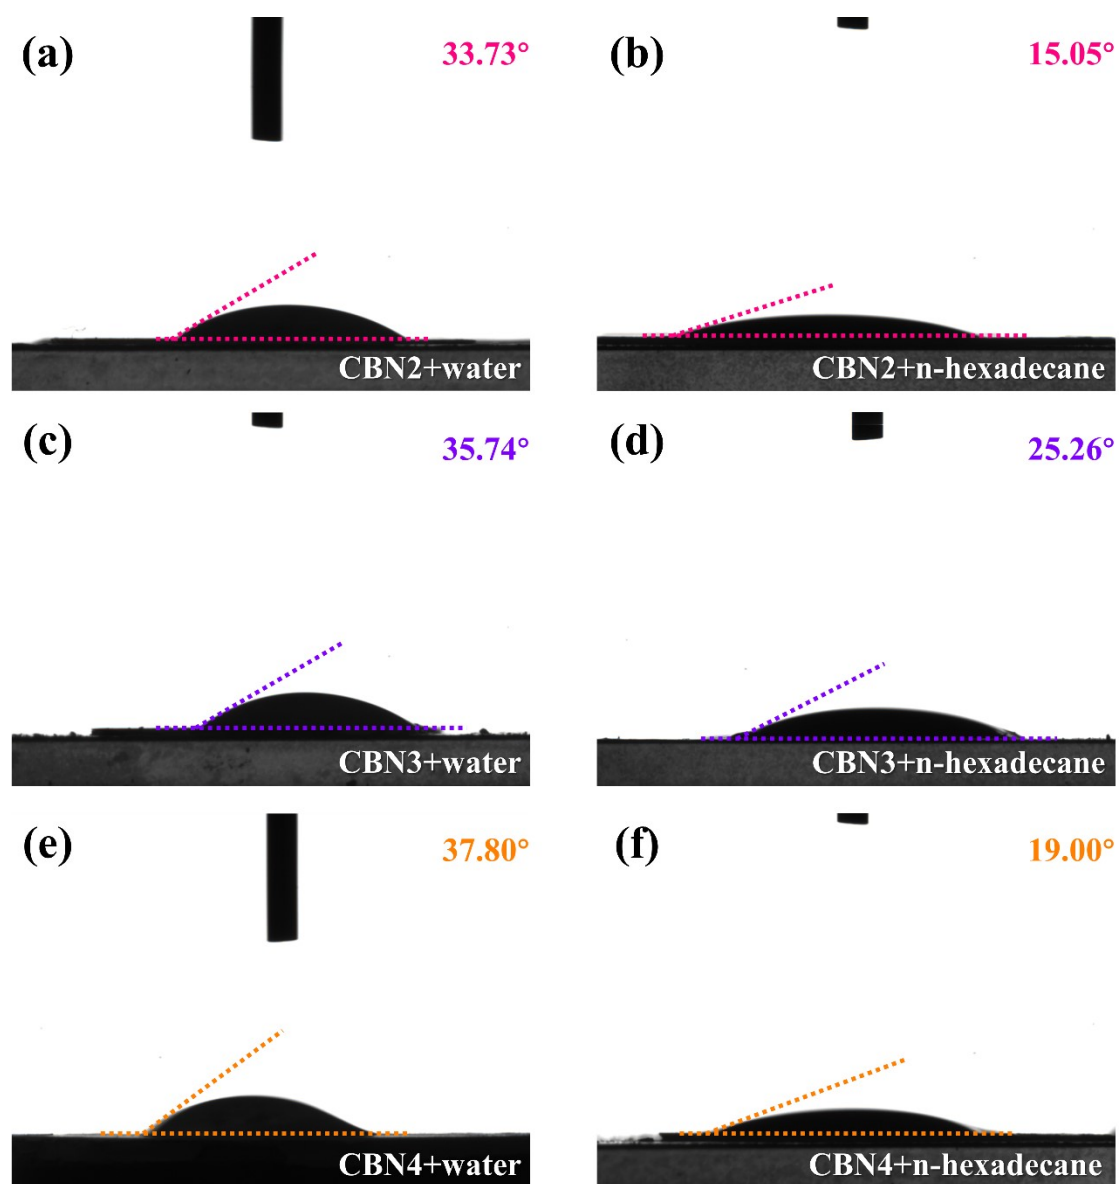

**Figure S5** Contact angles of a) CBN2, c) CBN3, and e) CBN4 on water, b) CBN2, d) CBN3, and f) CBN4 on n-hexadecane.

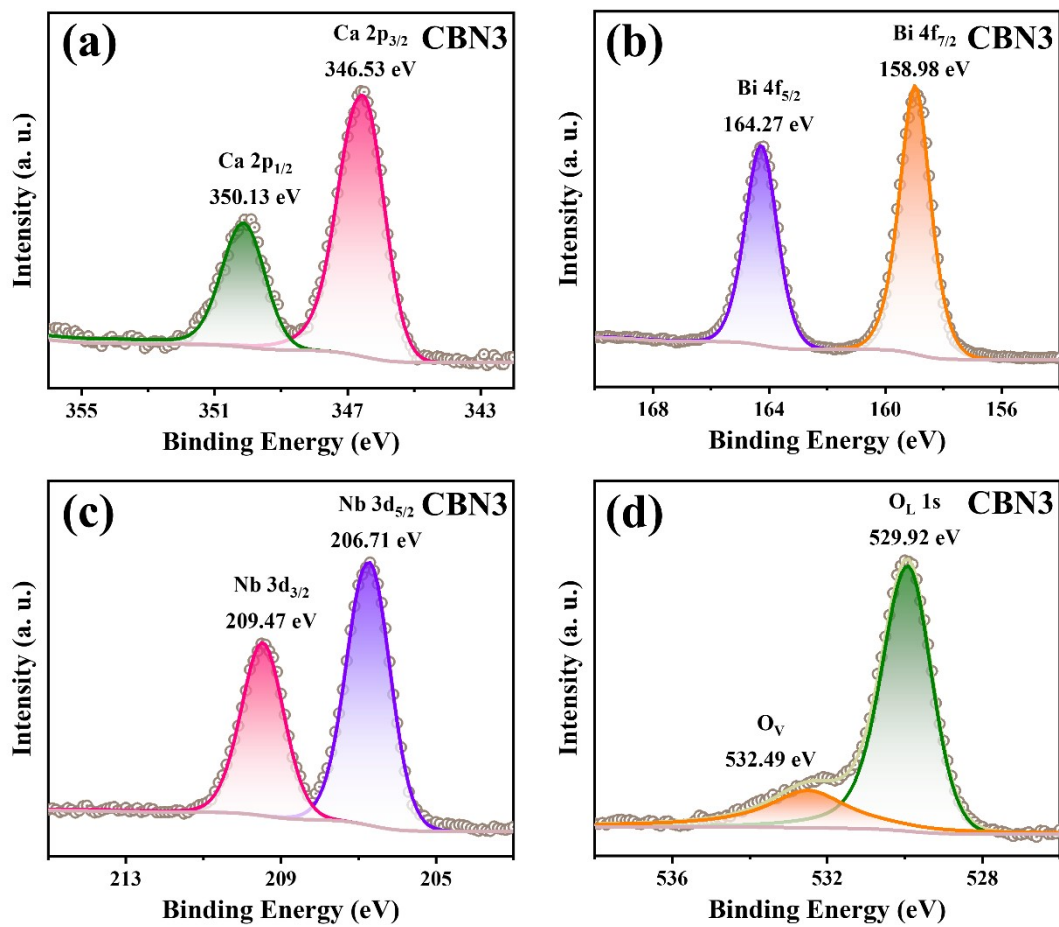

Figure S6 XPS spectra of a) Ca 2p, b) Bi 4f, c) Nb 3d, and d) O 1s of CBN3.

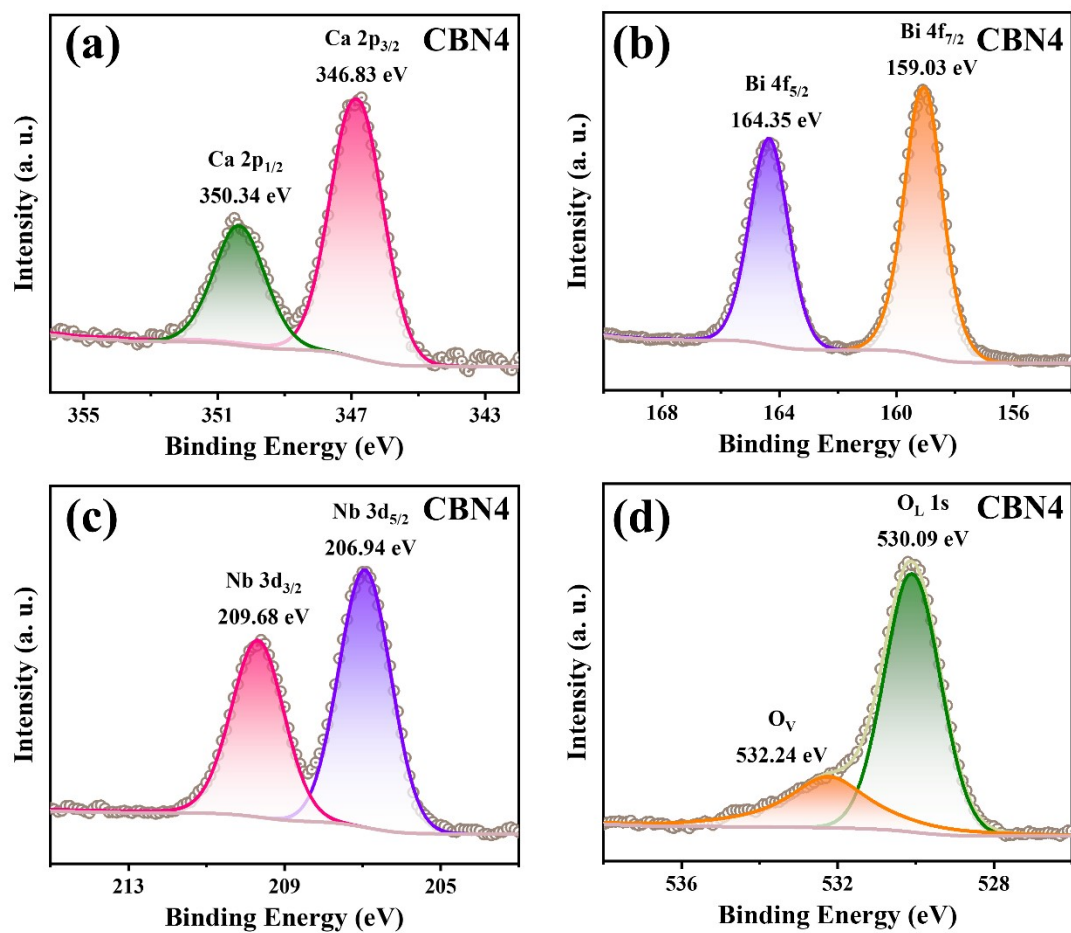

Figure S7 XPS spectra of a) Ca 2p, b) Bi 4f, c) Nb 3d, and d) O 1s of CBN4.



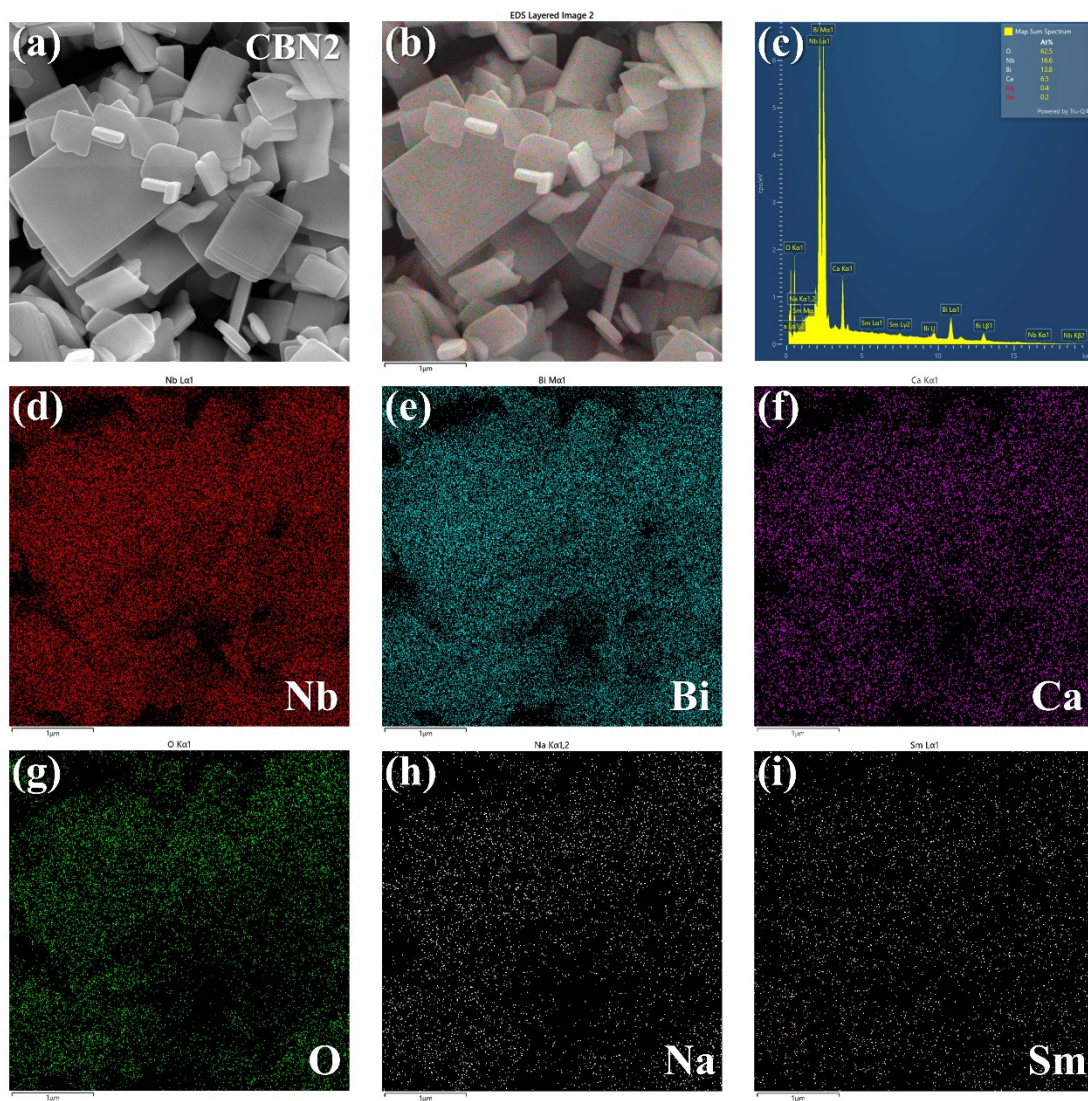

**Figure S8** a) SEM image, b) EDS layered image, c) map sum spectrum, d) Nb, e) Bi, f) Ca, g) O, h) Na, and i) Sm of CBN2.

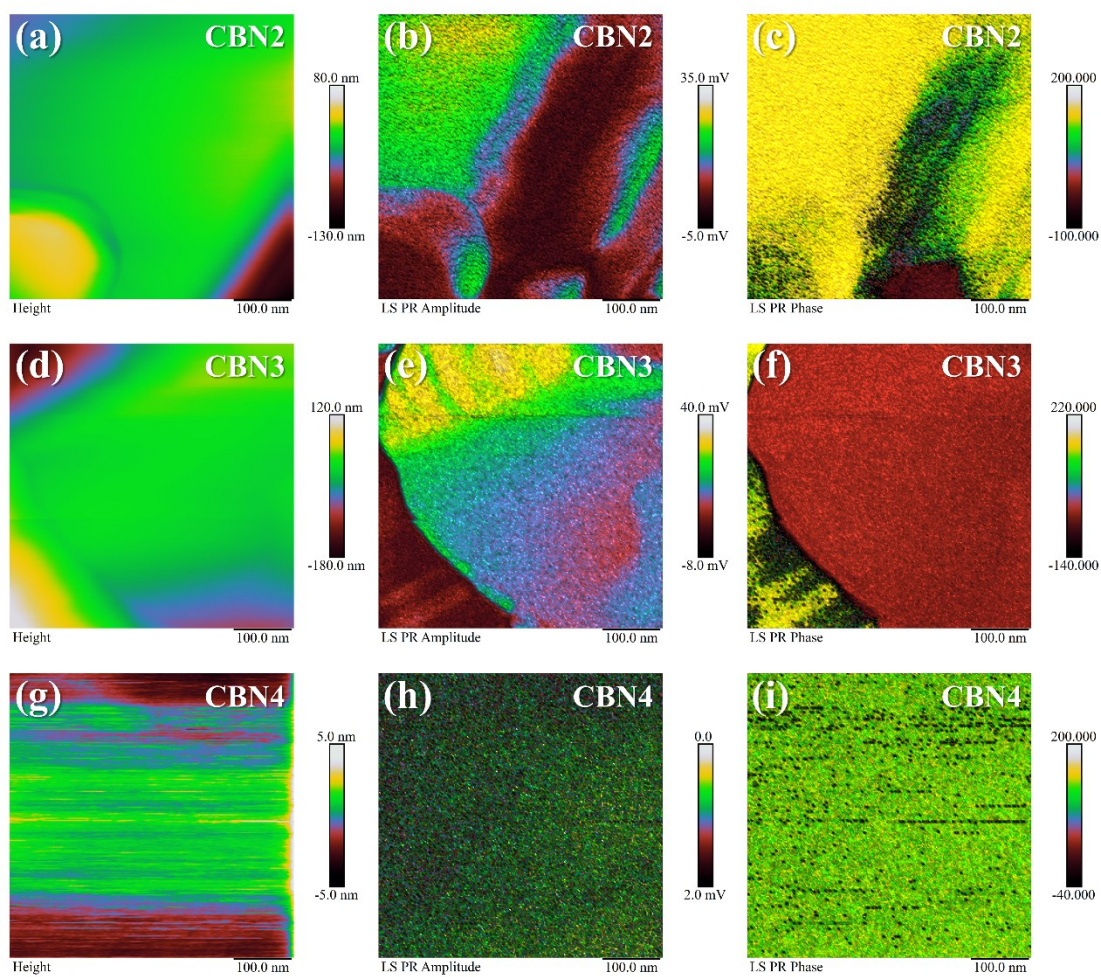

**Figure S9** a) Morphological image, b) amplitude image, and c) phase image of CBN2. d) Morphological image, e) amplitude image, and f) phase image of CBN3, g) Morphological image, h) amplitude image, and i) phase image of CBN4.

**(a) CBN3**

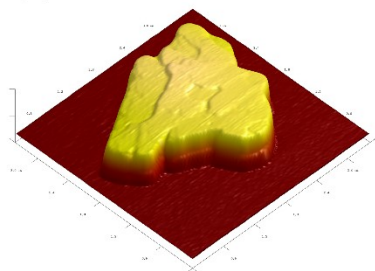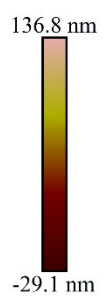

**(b) CBN4**

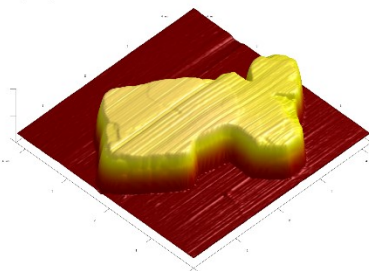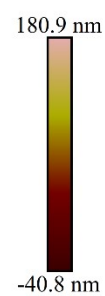

**Figure S10** 3D images of a) CBN3 and b) CBN4 by PFM.



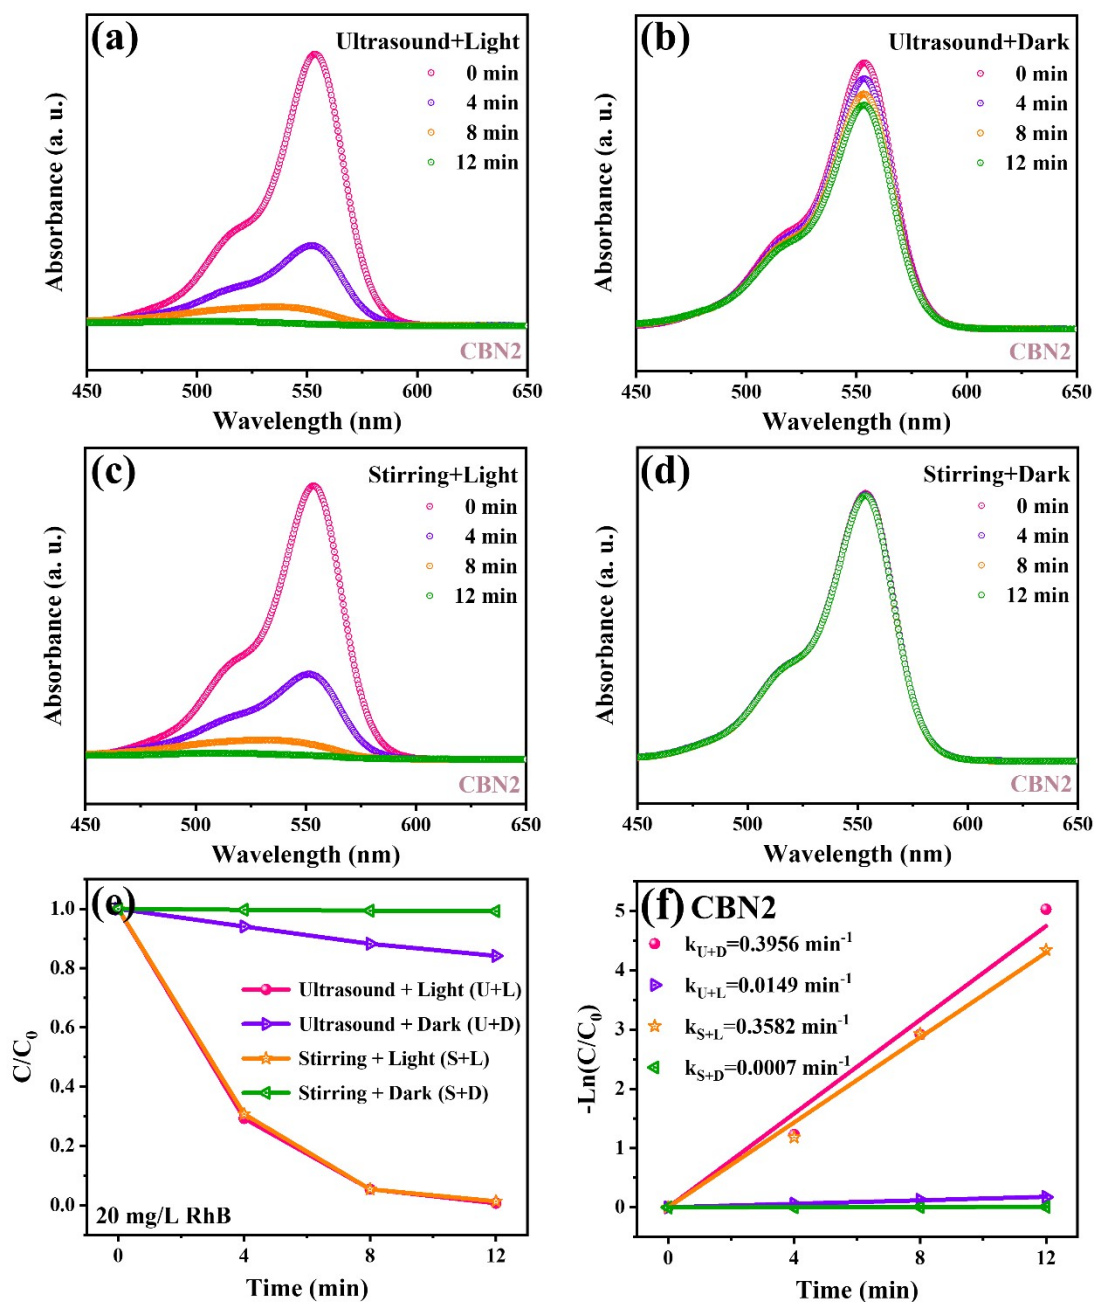

**Figure S11** Piezo-photocatalytic performance on  $20 \text{ mg}\cdot\text{L}^{-1}$  RhB by CBN2 under the following applied excitations: a) Ultrasound + Light, b) Ultrasound + Dark, c) Stirring + Light, and d) Stirring + Dark. Plots of e)  $C/C_0$  and f) the fitted  $k$ -values versus reaction time.

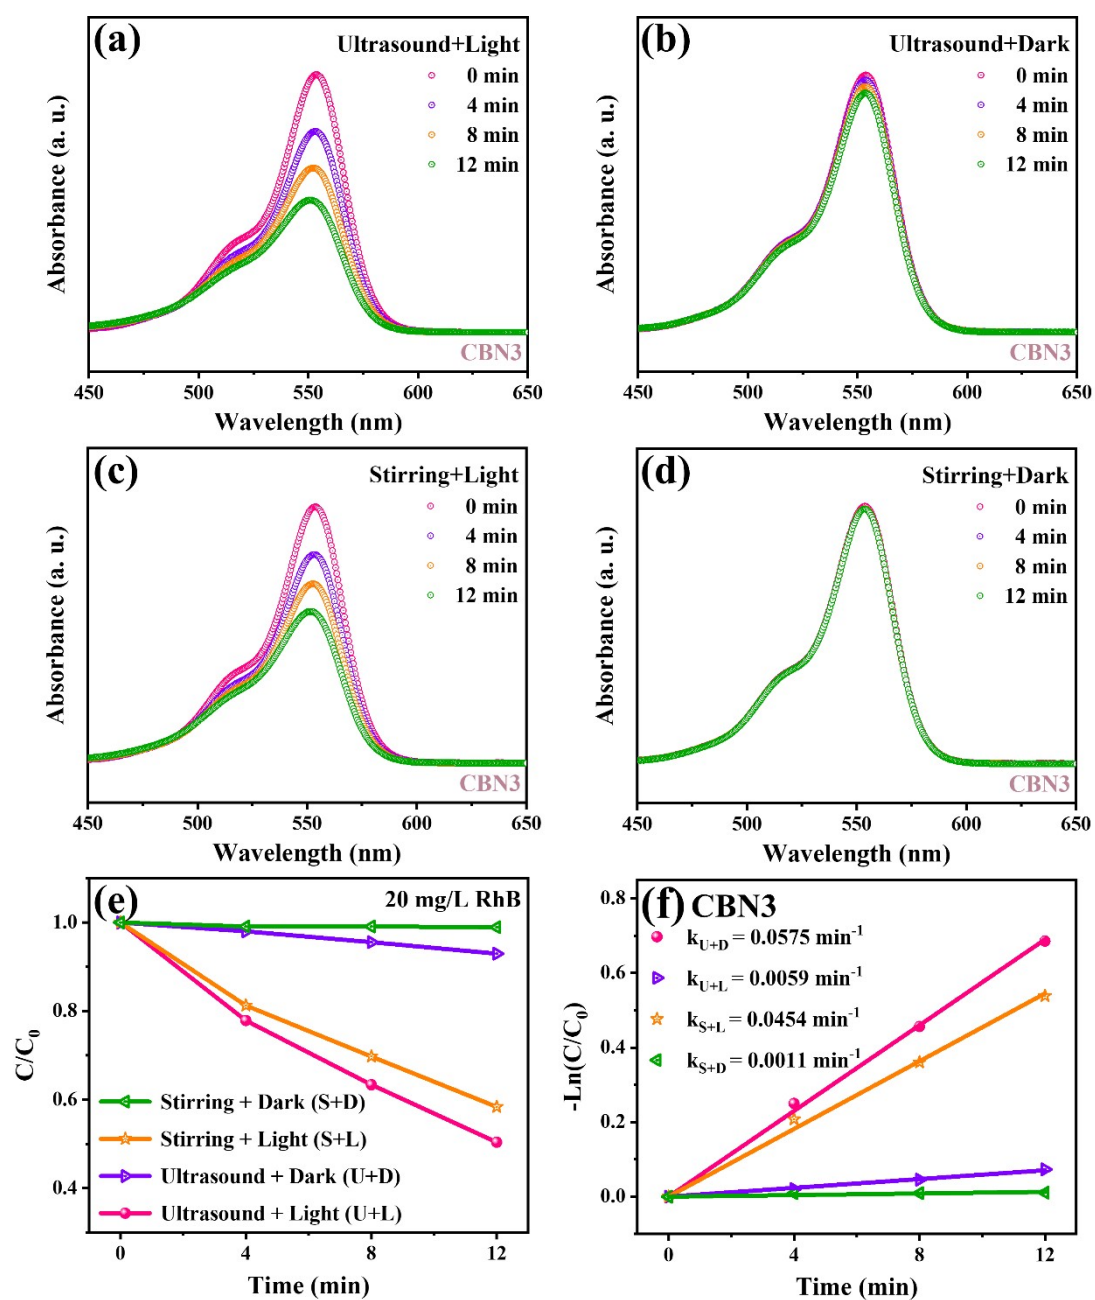

**Figure S12** Piezo-photocatalytic performance on  $20 \text{ mg}\cdot\text{L}^{-1}$  RhB by CBN3 under the following applied excitations: a) Ultrasound + Light, b) Ultrasound + Dark, c) Stirring + Light, and d) Stirring + Dark. Plots of e)  $C/C_0$  and f) the fitted  $k$ -values versus reaction time.

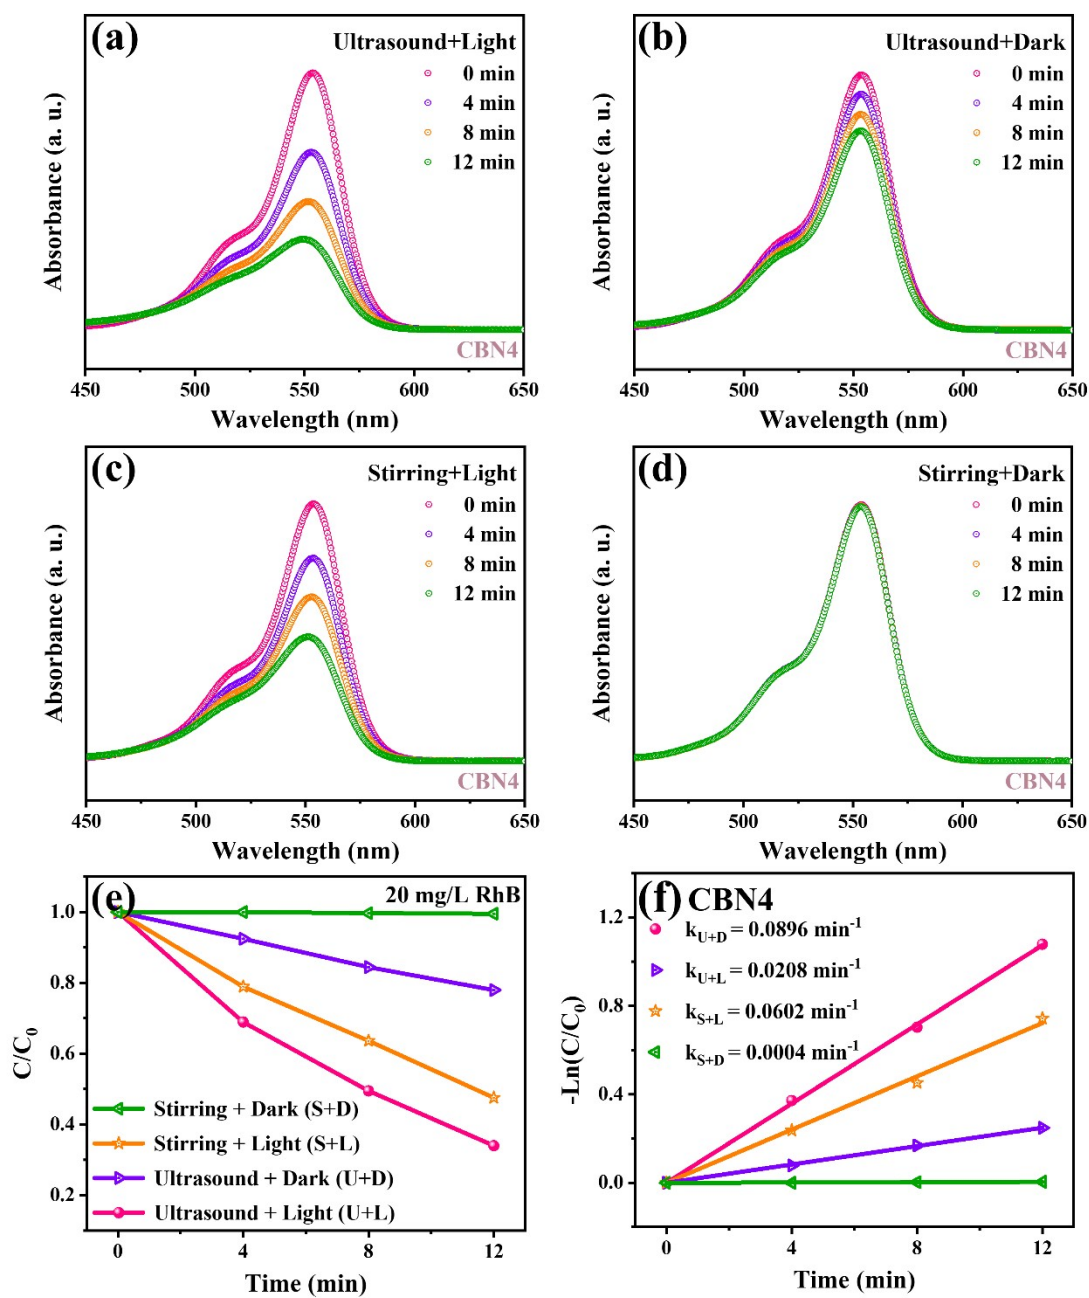

**Figure S13** Piezo-photocatalytic performance on  $20 \text{ mg}\cdot\text{L}^{-1}$  RhB by CBN4 under the following applied excitations: a) Ultrasound + Light, b) Ultrasound + Dark, c) Stirring + Light, and d) Stirring + Dark. Plots of e)  $C/C_0$  and f) the fitted  $k$ -values versus reaction time.

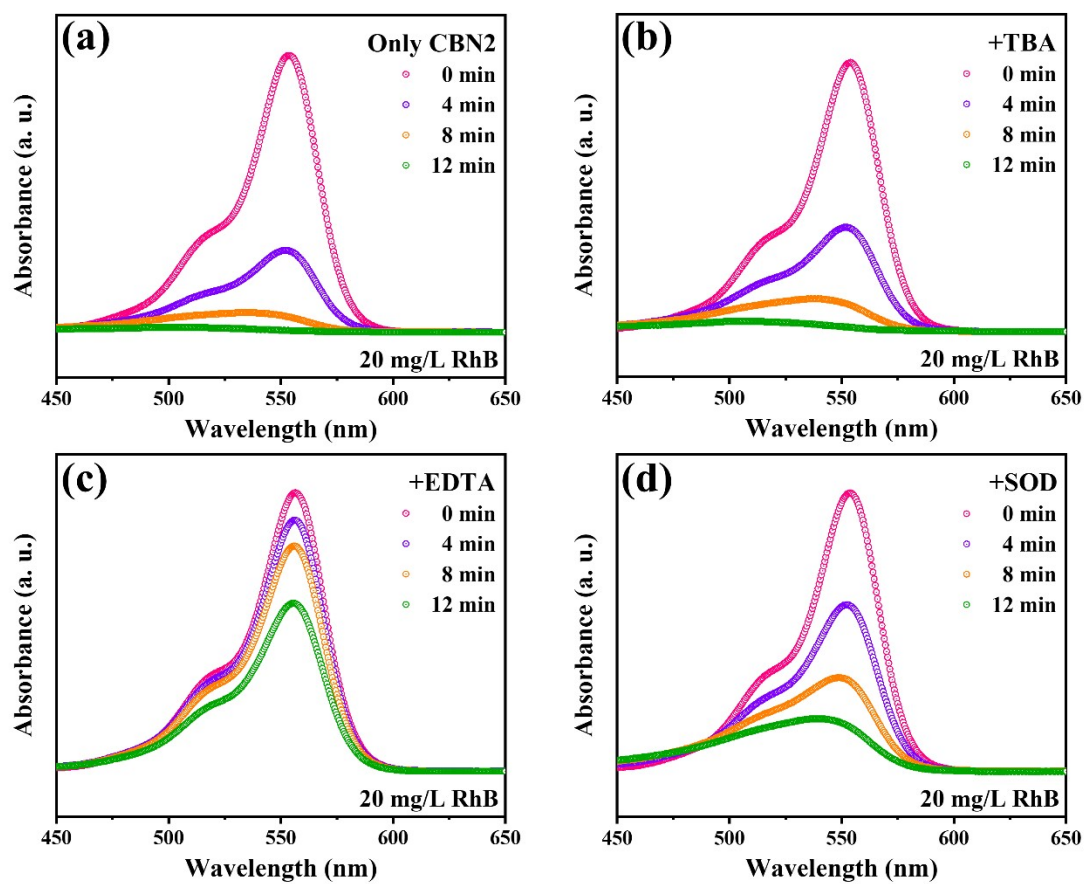

**Figure S14** Piezo-photocatalytic curves on  $20 \text{ mg}\cdot\text{L}^{-1}$  RhB by CBN2 with a) only catalysts, b) TBA, c) EDTA, and d) SOD added.

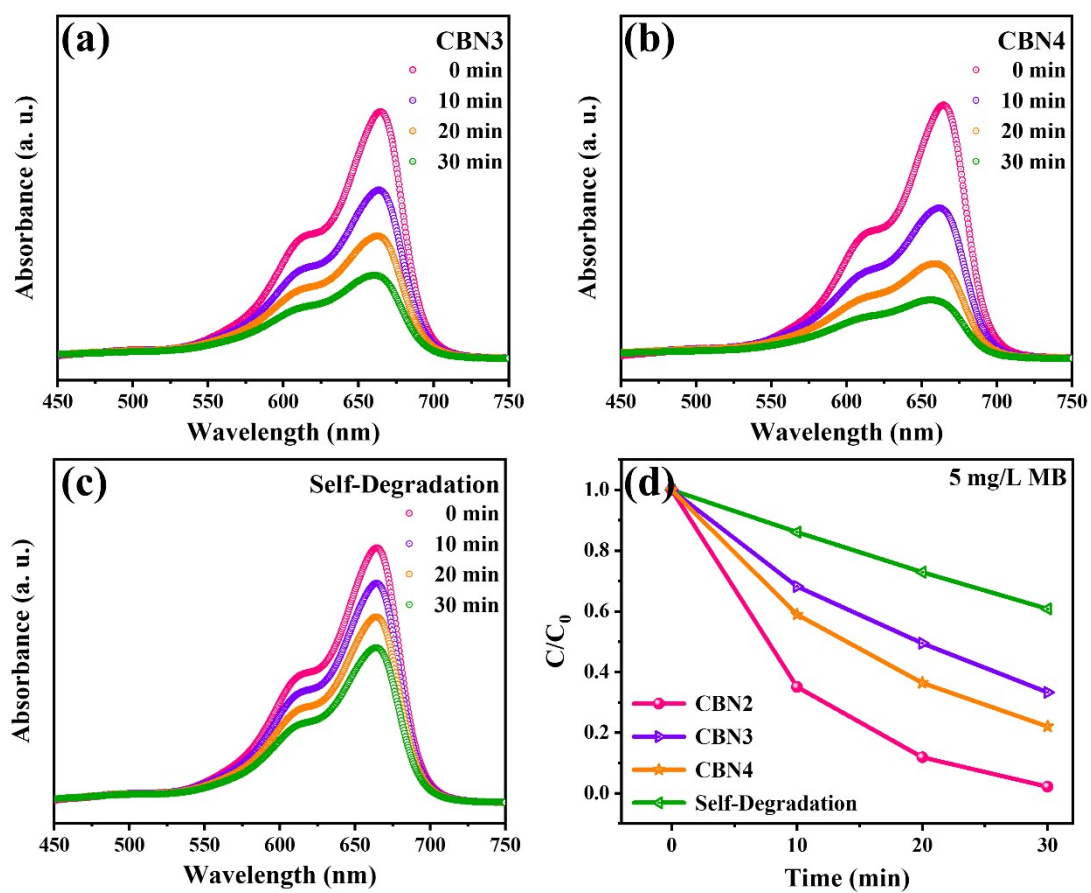

**Figure S15** Piezo-photocatalytic performance on  $5 \text{ mg} \cdot \text{L}^{-1}$  MB by a) CBN3, b) CBN4, and c) self-degradation. d) Plots of  $C/C_0$  versus reaction time.



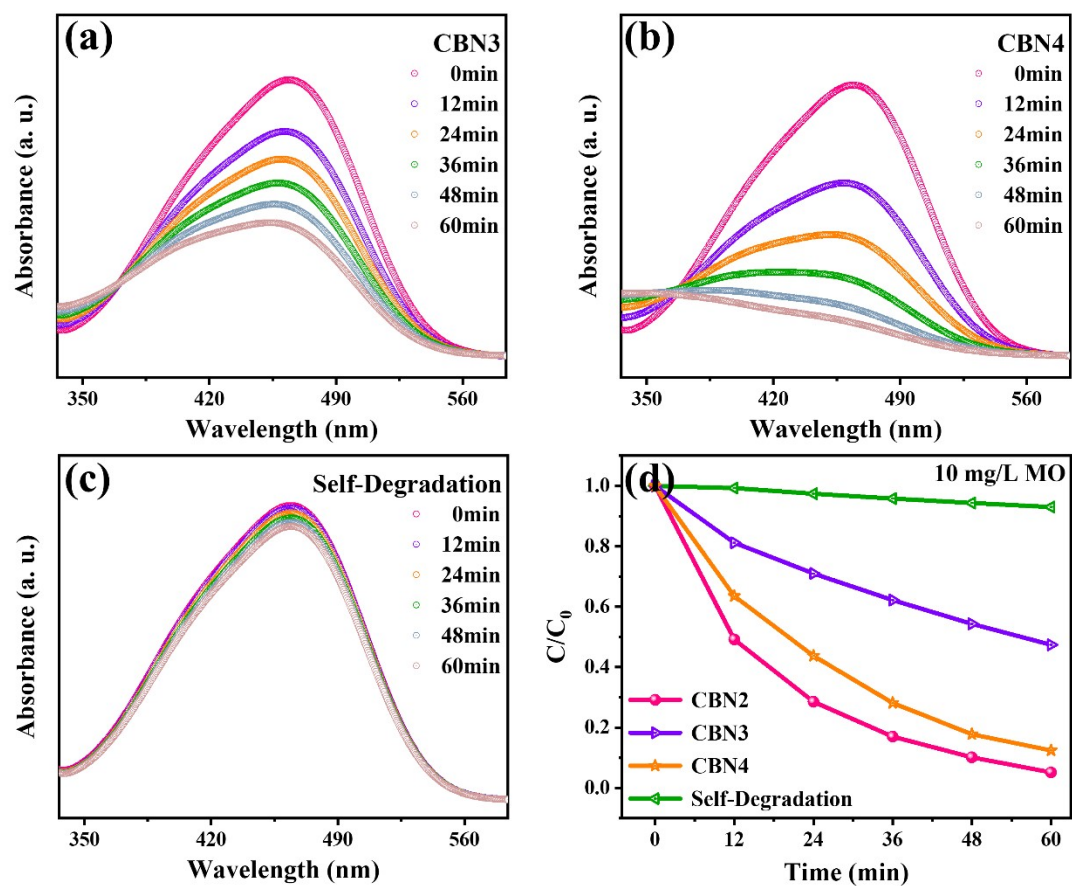

**Figure S16** Piezo-photocatalytic performance on  $10 \text{ mg}\cdot\text{L}^{-1}$  MO by a) CBN3, b) CBN4, and c) self-degradation. d) Plots of  $C/C_0$  versus reaction time.

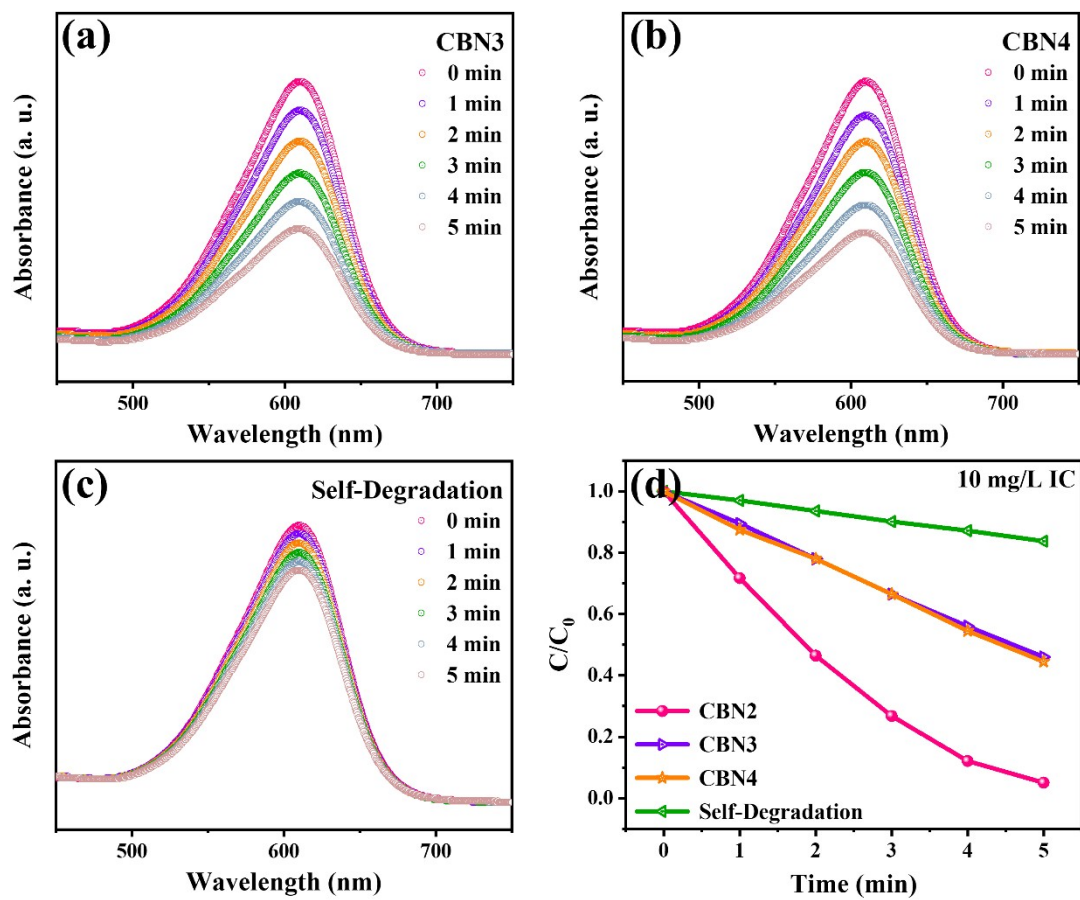

Figure S17 Piezo-photocatalytic performance on  $10 \text{ mg}\cdot\text{L}^{-1}$  IC by a) CBN3, b) CBN4, and c) self-degradation. d) Plots of  $C/C_0$  versus reaction time.

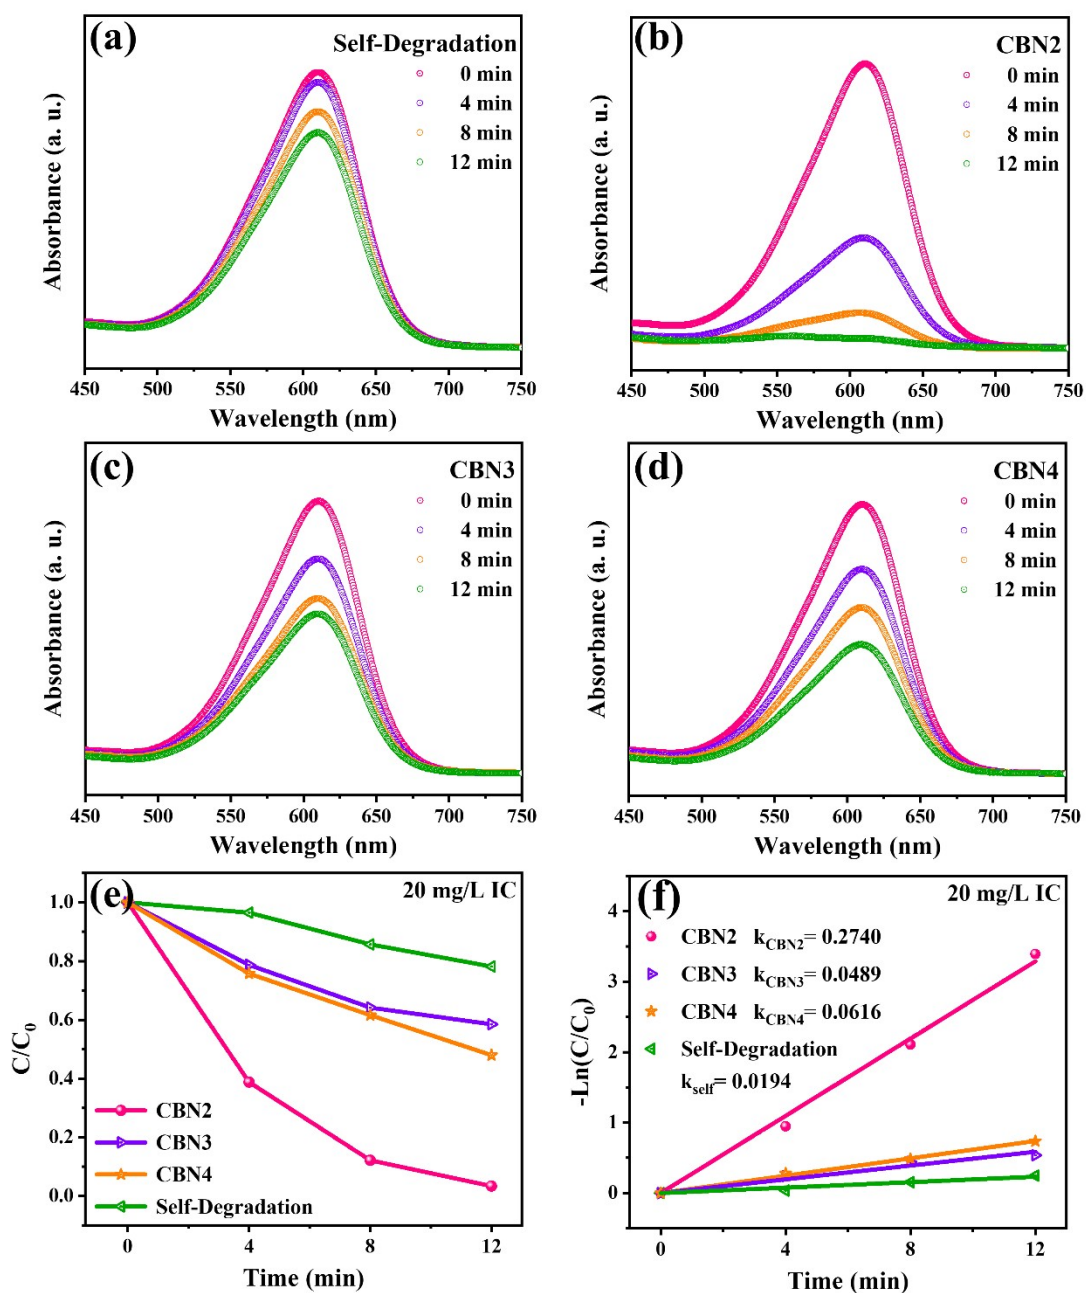

**Figure S18** Piezo-photocatalytic performance on  $20 \text{ mg}\cdot\text{L}^{-1}$  IC by a) self-degradation, b) CBN2, c) CBN3, and d) CBN4. Plots of e)  $C/C_0$  and f) the fitted  $k$ -values versus reaction time.

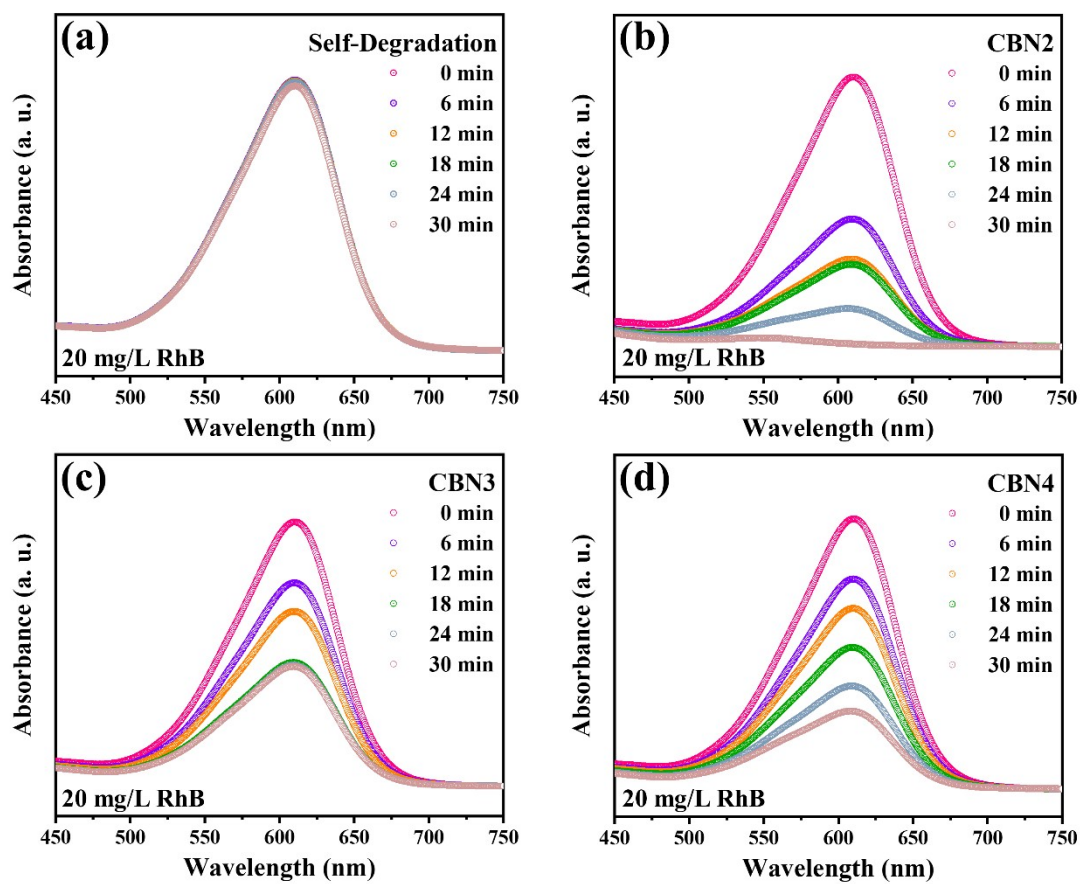

**Figure S19** Piezo-photocatalytic performance on  $50 \text{ mg}\cdot\text{L}^{-1}$  IC by a) self-degradation, b) CBN2, c) CBN3, and d) CBN4.

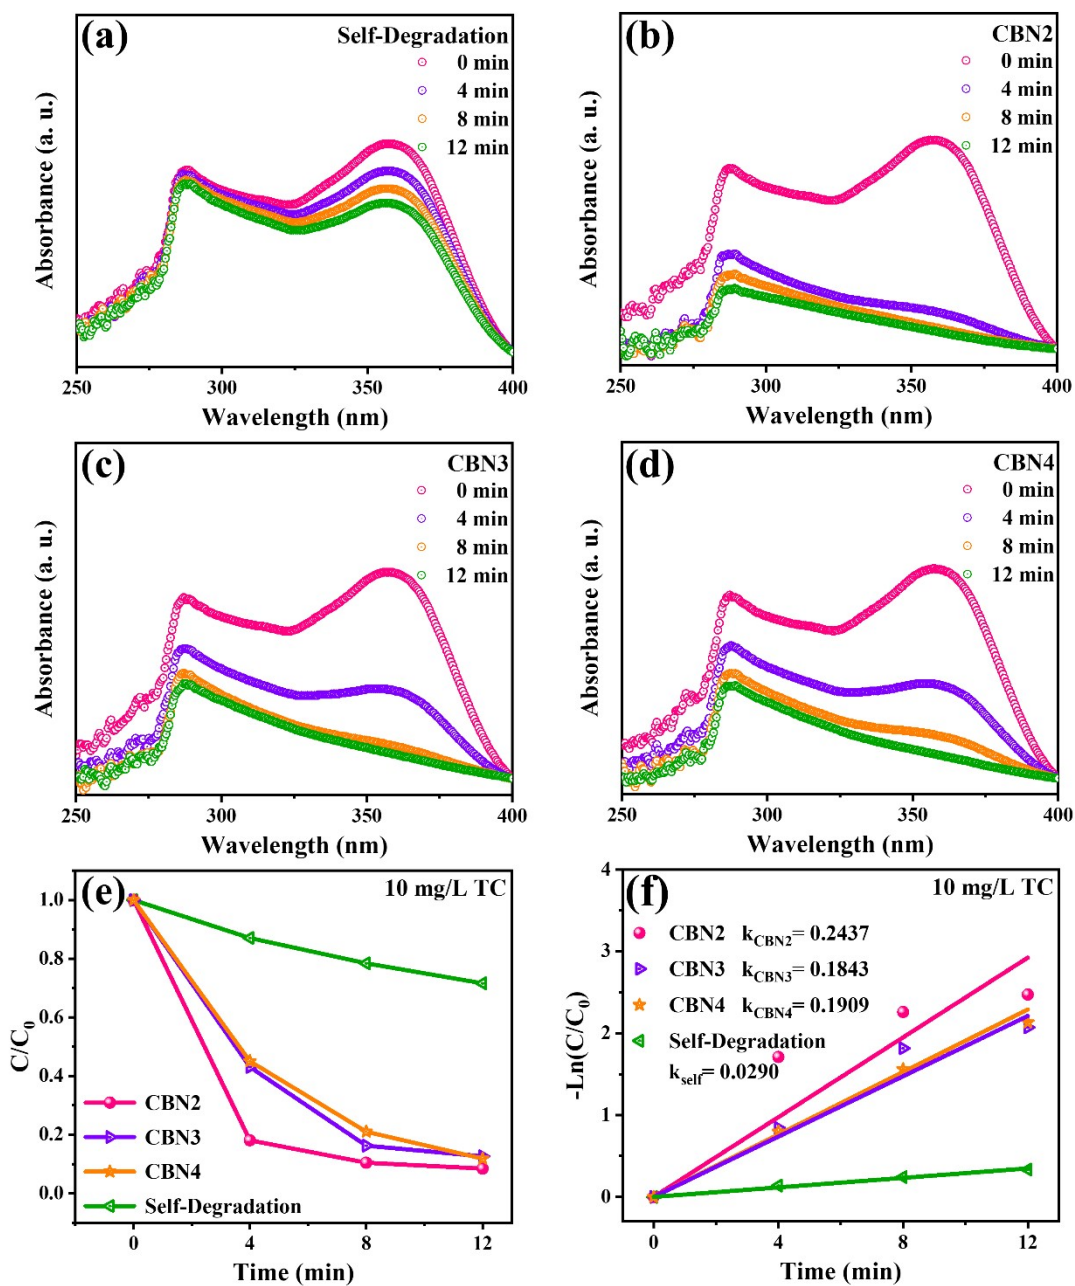

**Figure S20** Piezo-photocatalytic performance on  $10 \text{ mg}\cdot\text{L}^{-1}$  TC by a) self-degradation, b) CBN2, c) CBN3, and d) CBN4. Plots of e)  $C/C_0$  and f) the fitted  $k$ -values versus reaction time.

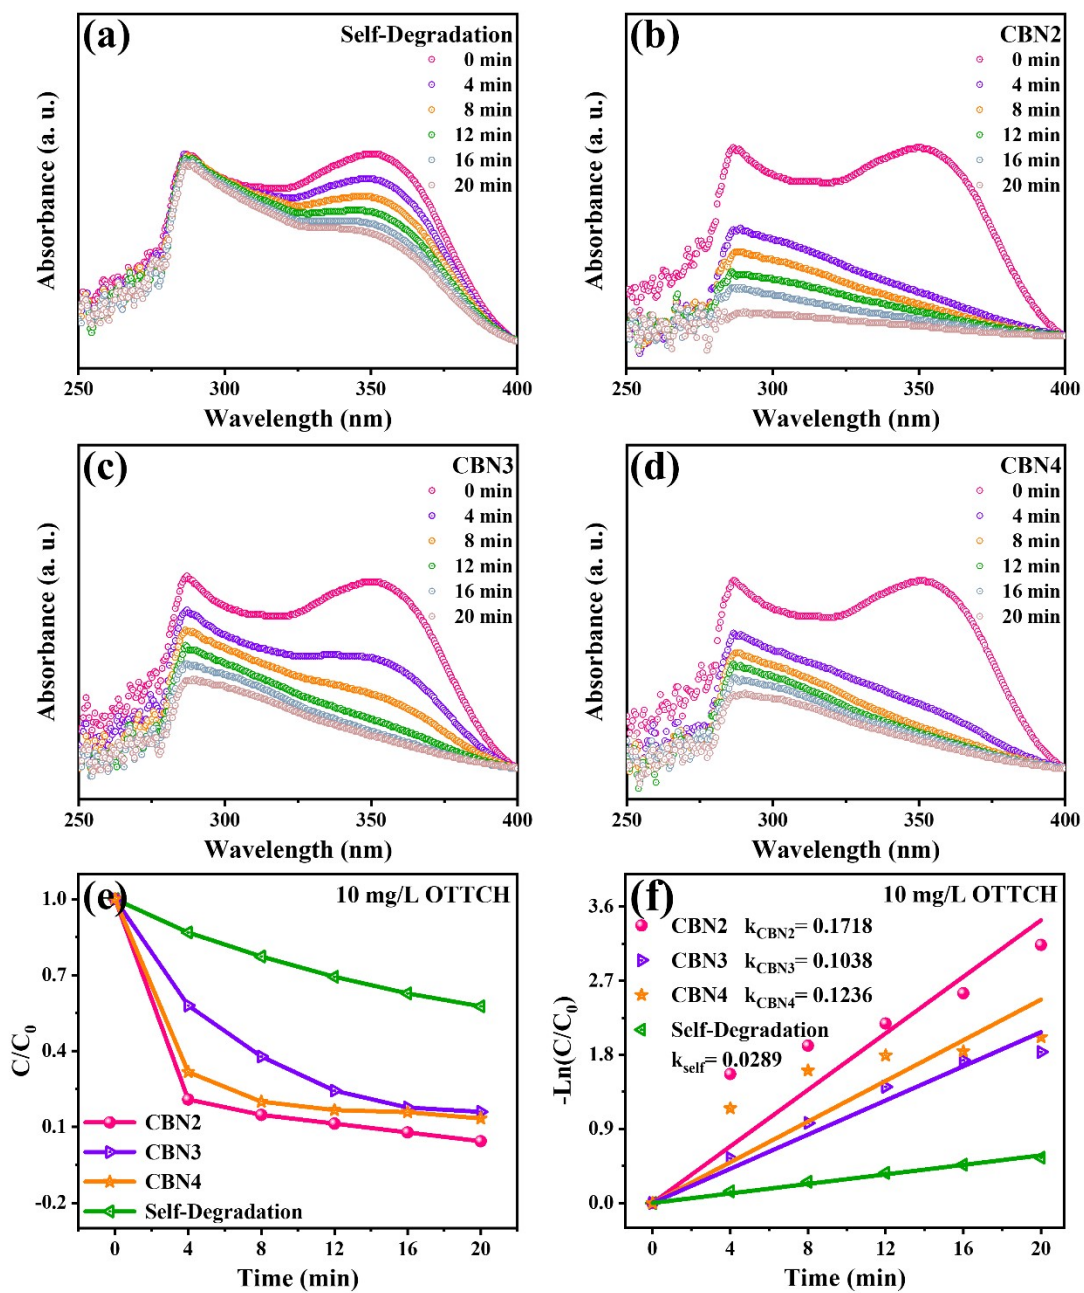

**Figure S21** Piezo-photocatalytic performance on  $10 \text{ mg}\cdot\text{L}^{-1}$  OTTCH by a) self-degradation, b) CBN2, c) CBN3, and d) CBN4. Plots of e)  $C/C_0$  and f) the fitted  $k$ -values versus reaction time.



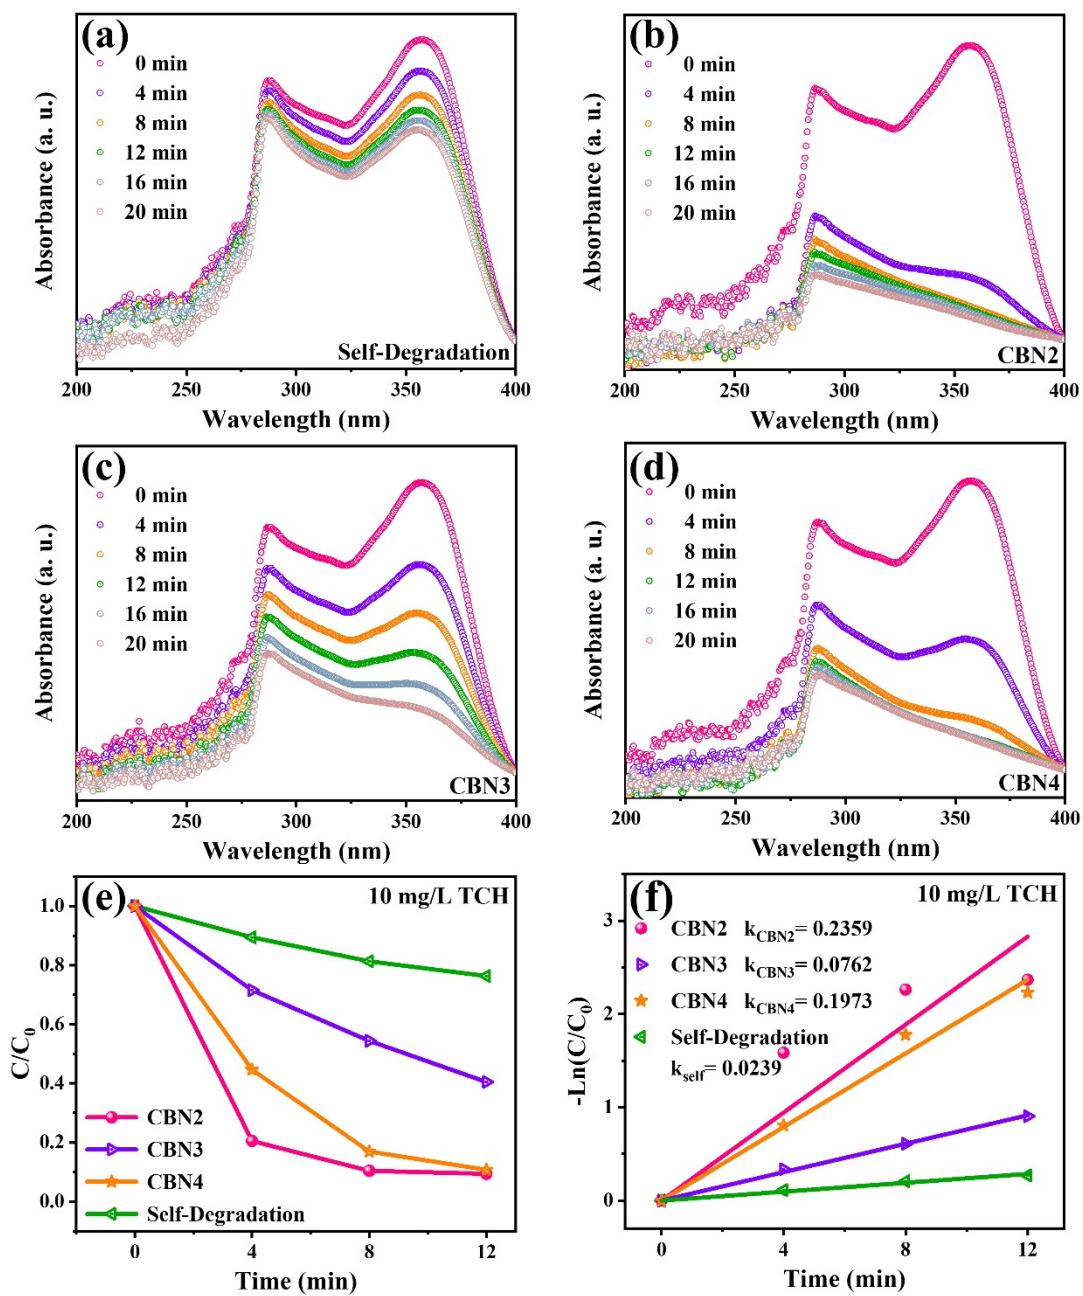

**Figure S22** Piezo-photocatalytic performance on  $10 \text{ mg}\cdot\text{L}^{-1}$  TCH by a) self-degradation, b) CBN2, c) CBN3, and d) CBN4. Plots of e)  $C/C_0$  and f) the fitted  $k$ -values versus reaction time.

**Table S1** Contents of the elements in CBN2 obtained by EDS.

| <b>Element</b> | <b>Signal Type</b> | <b>Wt%</b>    |
|----------------|--------------------|---------------|
| O              | EDS                | 17.44         |
| Na             | EDS                | 0.17          |
| Ca             | EDS                | 4.52          |
| Nb             | EDS                | 26.98         |
| Sm             | EDS                | 0.40          |
| Bi             | EDS                | 50.49         |
| <b>Total</b>   |                    | <b>100.00</b> |



**Table S2** Fitted results of Nyquist plots.

| <b>Samples</b> | <b>Ohmic Resistance</b> | <b>Transfer Resistance</b> |
|----------------|-------------------------|----------------------------|
| CBN2           | 13.89                   | 85461                      |
| CBN3           | 16.93                   | 315100                     |
| CBN4           | 14.55                   | 134860                     |

**Table S3** Fitted  $k$ -values of recently reported piezo-photocatalysis.

| catalyst                                                                                        | $C_{(\text{catalyst})}$ | $C_{(\text{Dye})}$           | Condition                                         | Year | $k \times 10^{-3}$<br>( $\text{min}^{-1}$ ) | Ref       |
|-------------------------------------------------------------------------------------------------|-------------------------|------------------------------|---------------------------------------------------|------|---------------------------------------------|-----------|
| BaTiO <sub>3</sub> -O <sub>v</sub> s nanoparticles                                              | 1 g·L <sup>-1</sup>     | 10 mg·L <sup>-1</sup><br>RhB | Ultrasonic: 300 W, 40 kHz<br>Xenon lamp: 300 W    | 2023 | 34.1                                        | 1         |
| NaNbO <sub>3</sub> /WO <sub>3</sub>                                                             | 0.25 g·L <sup>-1</sup>  | 10 mg·L <sup>-1</sup><br>RhB | Ultrasonic: 180 W, 40 kHz<br>Xenon lamp: 300 W    | 2023 | 10.7                                        | 2         |
| Bi <sub>0.5</sub> Na <sub>0.5</sub> TiO <sub>3</sub>                                            | 1 g·L <sup>-1</sup>     | 5 mg·L <sup>-1</sup><br>RhB  | Ultrasonic: 200 W, 40 kHz<br>Xenon lamp: 300 W    | 2022 | 167                                         | 3         |
| BiOCl/NaNbO <sub>3</sub>                                                                        | 1 g·L <sup>-1</sup>     | 5 mg·L <sup>-1</sup><br>RhB  | Ultrasonic: 50 W, 40 kHz<br>Xenon lamp: 300 W     | 2022 | 19.2                                        | 4         |
| Ag@Na <sub>0.5</sub> Bi <sub>0.5</sub> TiO <sub>3</sub>                                         | 1 g·L <sup>-1</sup>     | 5 mg·L <sup>-1</sup><br>RhB  | Ultrasonic: 300 W, 40 kHz<br>Xenon lamp: 300 W    | 2022 | 146                                         | 5         |
| AgCl/BiFeO <sub>3</sub>                                                                         | 0.5 g·L <sup>-1</sup>   | 10 mg·L <sup>-1</sup><br>RhB | Xenon lamp: 300 W                                 | 2024 | 13.07                                       | 6         |
| (Na <sup>+</sup> , Sm <sup>3+</sup> ) co-doped CaBi <sub>2</sub> Nb <sub>2</sub> O <sub>9</sub> | 0.5 g·L <sup>-1</sup>   | 10 mg·L <sup>-1</sup><br>RhB | Ultrasonic: 200 W, 45 kHz<br>Xenon lamp: 300 W    | 2024 | 773.4                                       | This work |
| (Na <sup>+</sup> , Sm <sup>3+</sup> ) co-doped CaBi <sub>2</sub> Nb <sub>2</sub> O <sub>9</sub> | 0.5 g·L <sup>-1</sup>   | 20 mg·L <sup>-1</sup><br>RhB | Ultrasonic: 200 W, 45 kHz<br>Xenon lamp: 300 W    | 2024 | 395.6                                       | This work |
| BiVO <sub>4</sub> nanorods                                                                      | 0.33 g·L <sup>-1</sup>  | 2 mg·L <sup>-1</sup><br>MB   | Ultrasonic: 140 W, 35 kHz<br>LED bulb: 20 W       | 2022 | 100                                         | 7         |
| Bi <sub>2</sub> VO <sub>5.5</sub>                                                               | 10 g·L <sup>-1</sup>    | 5 mg·L <sup>-1</sup><br>MB   | Ultrasonic: 120 W, 40 kHz<br>Two bulbs: 15 W each | 2023 | 5.29                                        | 8         |
| PVDF/CaNO <sub>3</sub>                                                                          | /                       | 2.5 mg·L <sup>-1</sup><br>MB | Ultrasonic: 250 W, 18 kHz<br>Mercury lamp: 250 W  | 2023 | 83                                          | 9         |
| KNbO <sub>3</sub> /MoS <sub>2</sub>                                                             | 1 g·L <sup>-1</sup>     | 10 ppm MB                    | Ultrasonic: 120 W, 40 kHz<br>Mercury lamp: 300 W  | 2023 | 10.17                                       | 10        |
| (Na <sup>+</sup> , Sm <sup>3+</sup> ) co-                                                       | 0.5 g·L <sup>-1</sup>   | 5 mg·L <sup>-1</sup>         | Ultrasonic: 200 W, 45 kHz                         | 2024 | 120.1                                       | This      |

|                                                                                                 |                       |                       |                           |      |       |           |
|-------------------------------------------------------------------------------------------------|-----------------------|-----------------------|---------------------------|------|-------|-----------|
| doped CaBi <sub>2</sub> Nb <sub>2</sub> O <sub>9</sub>                                          |                       | MB                    | Xenon lamp: 300 W         |      |       | work      |
| ZnO/MoS <sub>2</sub>                                                                            | /                     | 10 mg·L <sup>-1</sup> | Stirring: 1000 rpm        | 2021 | 59    | 11        |
|                                                                                                 |                       | MO                    | Xe lamp: 300 W            |      |       |           |
| ZnO-S                                                                                           | 1 g·L <sup>-1</sup>   | 50 mg·L <sup>-1</sup> | Ultrasonic: 200 W, 40 kHz | 2021 | 19    | 12        |
|                                                                                                 |                       | MO                    | Mercury lamp: 300 W       |      |       |           |
| BaTiO <sub>3</sub> /CuO                                                                         | 1 g·L <sup>-1</sup>   | 10 mg·L <sup>-1</sup> | Ultrasonic                | 2022 | 50    | 13        |
|                                                                                                 |                       | MO                    | Mercury lamp: 200 W       |      |       |           |
| Cu@Na <sub>0.5</sub> Bi <sub>4.5</sub> Ti <sub>4</sub> O <sub>15</sub>                          | 1 g·L <sup>-1</sup>   | 10 mg·L <sup>-1</sup> | Stirring                  | 2022 | 24.67 | 14        |
|                                                                                                 |                       | MO                    | Mercury lamp: 300 W       |      |       |           |
| (Na <sup>+</sup> , Sm <sup>3+</sup> ) co-doped CaBi <sub>2</sub> Nb <sub>2</sub> O <sub>9</sub> | 0.5 g·L <sup>-1</sup> | 10 mg·L <sup>-1</sup> | Ultrasonic: 200 W, 45 kHz | 2024 | 49.3  | This work |
|                                                                                                 |                       | MO                    | Xenon lamp: 300 W         |      |       |           |
| BaTiO <sub>3</sub> nanoparticles                                                                | 0.5 g·L <sup>-1</sup> | 10 mg·L <sup>-1</sup> | Ultrasonic: 200 W, 45 kHz | 2023 | 99    | 15        |
|                                                                                                 |                       | IC                    | Xenon lamp: 300 W         |      |       |           |
| BaTiO <sub>3</sub> @TiO <sub>2</sub>                                                            | 0.5 g·L <sup>-1</sup> | 10 mg·L <sup>-1</sup> | Ultrasonic: 200 W, 45 kHz | 2021 | 108   | 16        |
|                                                                                                 |                       | IC                    | Xenon lamp: 300 W         |      |       |           |
| (Na <sup>+</sup> , Sm <sup>3+</sup> ) co-doped CaBi <sub>2</sub> Nb <sub>2</sub> O <sub>9</sub> | 0.5 g·L <sup>-1</sup> | 10 mg·L <sup>-1</sup> | Ultrasonic: 200 W, 45 kHz | 2024 | 530.7 | This work |
|                                                                                                 |                       | IC                    | Xenon lamp: 300 W         |      |       |           |
| (Na <sup>+</sup> , Sm <sup>3+</sup> ) co-doped CaBi <sub>2</sub> Nb <sub>2</sub> O <sub>9</sub> | 0.5 g·L <sup>-1</sup> | 20 mg·L <sup>-1</sup> | Ultrasonic: 200 W, 45 kHz | 2024 | 274.0 | This work |
|                                                                                                 |                       | IC                    | Xenon lamp: 300 W         |      |       |           |
| (Na <sup>+</sup> , Sm <sup>3+</sup> ) co-doped CaBi <sub>2</sub> Nb <sub>2</sub> O <sub>9</sub> | 0.5 g·L <sup>-1</sup> | 50 mg·L <sup>-1</sup> | Ultrasonic: 200 W, 45 kHz | 2024 | 115.3 | This work |
|                                                                                                 |                       | IC                    | Xenon lamp: 300 W         |      |       |           |

## References

- (1) Xiao, Q.; Chen, L.; Xu, Y.; Feng, W.; Qiu, X. Impact of oxygen vacancy on piezo-photocatalytic catalytic activity of barium titanate. *Applied Surface Science* **2023**, *619*, 156794. DOI: <https://doi.org/10.1016/j.apsusc.2023.156794>.
- (2) Yan, X.; Zhang, S.; Pan, L.; Ai, T.; Li, Z.; Niu, Y. Synergetic piezo-photocatalytic effect in  $\text{NaNbO}_3/\text{WO}_3$  photocatalyst for RhB degradation. *Inorganic Chemistry Communications* **2023**, *158*, 111510. DOI: <https://doi.org/10.1016/j.inoche.2023.111510>.
- (3) Zhou, X.; Sun, Q.; Xiao, Z.; Luo, H.; Zhang, D. Three-dimensional BNT/PVDF composite foam with a hierarchical pore structure for efficient piezo-photocatalysis. *Journal of Environmental Chemical Engineering* **2022**, *10* (5). DOI: 10.1016/j.jece.2022.108399.
- (4) Li, L.; Cao, W.; Yao, J.; Liu, W.; Li, F.; Wang, C. Synergistic piezo-photocatalysis of BiOCl/ $\text{NaNbO}_3$  heterojunction piezoelectric composite for high-efficient organic pollutant degradation. In *Nanomaterials*, 2022; Vol. 12.
- (5) Shi, J.; Xie, Z.; Tang, X.; Wang, Y.; Yuan, G.; Liu, J.-M. Enhanced piezo-photocatalytic performance of  $\text{Ag}@_{\text{Na}_{0.5}\text{Bi}_{0.5}\text{TiO}_3}$  composites. *Journal of Alloys and Compounds* **2022**, *911*, 164885. DOI: <https://doi.org/10.1016/j.jallcom.2022.164885>.
- (6) Xian, T.; Ma, X.; Sun, X.; Sun, C.; Wang, H.; Di, L.; Ma, K.; Yang, H. Construction of p-n type AgCl/BiFeO<sub>3</sub> heterojunction with promising photocatalytic and piezo-photocatalytic water purification. *Optical Materials* **2024**, *149*, 115054. DOI: <https://doi.org/10.1016/j.optmat.2024.115054>.
- (7) Deka, S.; Devi, M. B.; Khan, M. R.; Keerthana; Venimadhav, A.; Choudhury, B. Piezo-photocatalytic and photocatalytic bismuth vanadate nanorods with antibacterial property. *ACS Applied Nano Materials* **2022**, *5* (8), 10724-10734. DOI: 10.1021/acsanm.2c02072.
- (8) Kumar, M.; Vaish, R.; Kebaili, I.; Boukhris, I.; Kwang Benno Park, H.; Hwan Joo, Y.; Hyun Sung, T.; Kumar, A. Ball-milling synthesized  $\text{Bi}_2\text{VO}_{5.5}$  for piezo-photocatalytic assessment. *Scientific Reports* **2023**, *13* (1), 8188. DOI: 10.1038/s41598-023-33658-2.
- (9) Orudzhev, F. F.; Sobola, D. S.; Ramazanov, S. M.; Častková, K.; Selimov, D. A.; Rabadanova, A. A.; Shuaibov, A. O.; Gulakhmedov, R. R.; Abdurakhmanov, M. G.; Giraev, K. M. Hydrogen bond-induced activation of photocatalytic and piezophotocatalytic properties in calcium nitrate doped electrospun PVDF fibers. *Polymers* **2023**, *15* (15), 3252.
- (10) Ma, W.; Du, M.; Li, H.; Wang, Y.; Han, Z.; Chen, C.; Zhang, S.; Han, Q.; Li, Y.; Fang, J.; et al. The binary piezoelectric synergistic effect of  $\text{KNbO}_3/\text{MoS}_2$  heterojunction for improving photocatalytic performance. *Journal of Alloys and Compounds* **2023**, *960*, 170669. DOI: <https://doi.org/10.1016/j.jallcom.2023.170669>.
- (11) Fu, Y.; Ren, Z.; Wu, J.; Li, Y.; Liu, W.; Li, P.; Xing, L.; Ma, J.; Wang, H.; Xue, X. Direct Z-scheme heterojunction of ZnO/ $\text{MoS}_2$  nanoarrays realized by flowing-induced piezoelectric field for enhanced sunlight photocatalytic performances. *Applied Catalysis B: Environmental* **2021**, *285*, 119785. DOI: <https://doi.org/10.1016/j.apcatb.2020.119785>.
- (12) Yang, R.; Wu, Z.; Yang, Y.; Li, Y.; Zhang, L.; Yu, B. Understanding the origin of synergistic catalytic activities for ZnO based sonophotocatalytic degradation of methyl orange. *Journal of the Taiwan Institute of Chemical Engineers* **2021**, *119*, 128-135. DOI: <https://doi.org/10.1016/j.jtice.2021.01.028>.
- (13) Yu, C.; Tan, M.; Tao, C.; Hou, Y.; Liu, C.; Meng, H.; Su, Y.; Qiao, L.; Bai, Y. Remarkably enhanced piezo-photocatalytic performance in  $\text{BaTiO}_3/\text{CuO}$  heterostructures for organic pollutant degradation. *Journal of Advanced Ceramics* **2022**, *11* (3), 414-426. DOI: 10.1007/s40145-021-0544-4.

- (14) Lan, S.; Zheng, M.; Wu, J.; Lv, H.; Gao, X.; Zhang, Y.; Zhu, M.; Hou, Y. Copper nanoparticles-modified  $\text{Na}_{0.5}\text{Bi}_{4.5}\text{Ti}_4\text{O}_{15}$  micron-sheets as a highly efficient and low cost piezo-photocatalyst. *Journal of Alloys and Compounds* **2023**, *935*, 168130. DOI: <https://doi.org/10.1016/j.jallcom.2022.168130>.
- (15) Yi, Q.; Luo, H.; Xiong, H.; Liu, Q.; Zhai, D.; Sun, Q.; Zhang, D. Enhanced catalytic activity of Molar-like  $\text{BaTiO}_3$  by oxygen vacancies. *Ceramics International* **2023**, *49* (23, Part B), 39707-39718. DOI: <https://doi.org/10.1016/j.ceramint.2023.09.332>.
- (16) Liu, Q.; Zhai, D.; Xiao, Z.; Tang, C.; Sun, Q.; Bowen, C. R.; Luo, H.; Zhang, D. Piezo-photoelectronic coupling effect of  $\text{BaTiO}_3@\text{TiO}_2$  nanowires for highly concentrated dye degradation. *Nano Energy* **2022**, *92*, 106702. DOI: 10.1016/j.nanoen.2021.106702.
